# Supplementary material for: In Cellulo and In Vivo Comparison of Cholesterol, Beta-Sitosterol and Dioleylphosphatidylethanolamine for Lipid Nanoparticle Formulation of mRNA
Source: MDPI journal article supplement (doi:10.3390/nano12142446), 2022-07-17
Supplement: s1 [file s1]

# Supplementary Information for

## In Cellulo and In Vivo Comparison of Cholesterol, Beta-Sitosterol and Dioleoylphosphatidylethanolamine for Lipid Nanoparticle Formulation of mRNA

Ayoub Medjmedj <sup>1,†</sup>, Albert Ngalle-Loth <sup>1,†</sup>, Rudy Clemençon <sup>1</sup>, Josef Hamacek <sup>1,2</sup>, Chantal Pichon <sup>1,2</sup> and Federico Perche <sup>1,\*</sup>

<sup>1</sup> Centre de Biophysique Moléculaire UPR4301 CNRS, Rue Charles Sadron, 45071 Orléans, France; ayoub.medjmedj@cnrs-orleans.fr (A.M.); albert.ngalle-loth@cnrs-orleans.fr (A.N.-L.); rudy.clemencon@cnrs.fr (R.C.); josef.hamacek@cnrs.fr (J.H.); pichon@cnrs.fr (C.P.)

<sup>2</sup> Centre de Biophysique Moléculaire, University of Orléans, 45100 Orléans, France

\* Correspondence: federico.perche@cnrs-orleans.fr; Tel.: +33-2-38-25-55-44

† These authors contributed equally to this work.

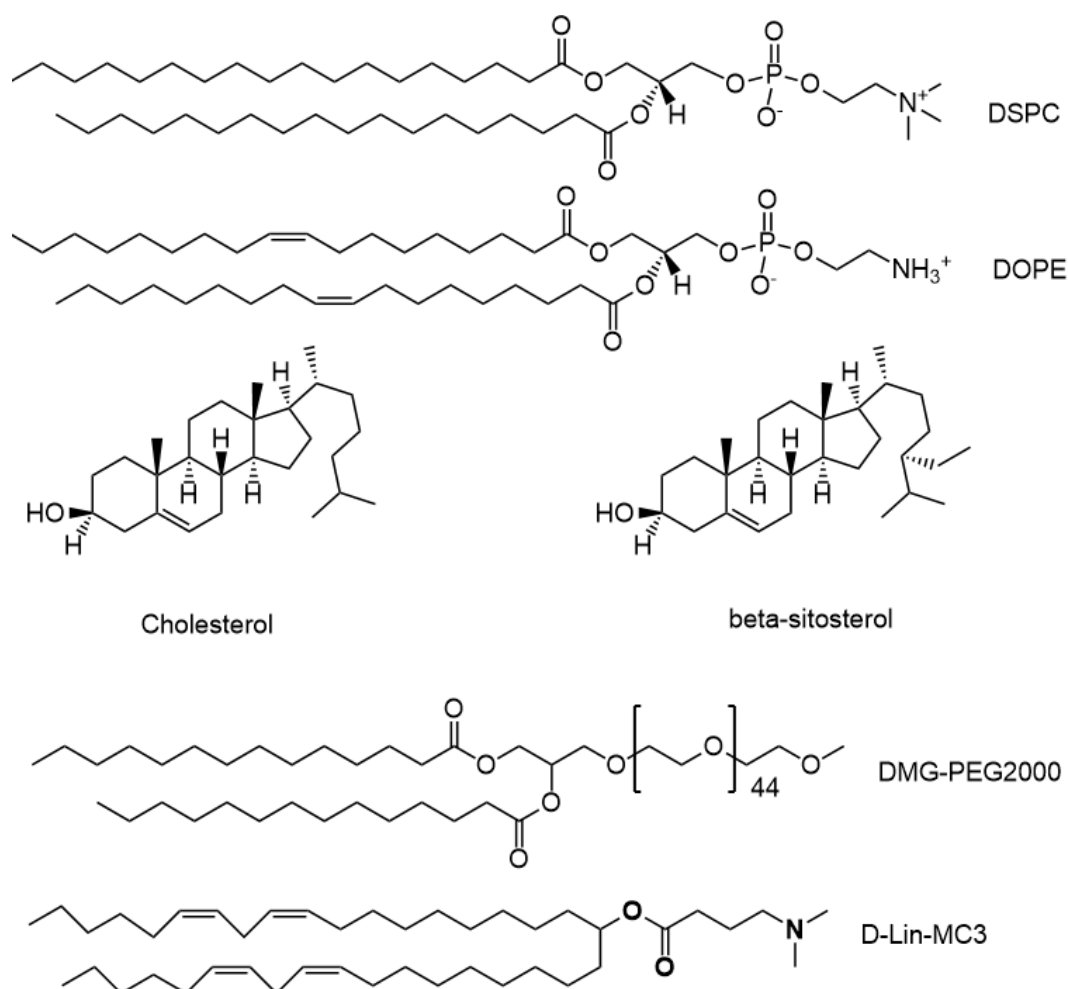

**Figure S1.** Structures of the lipids used in this study.

## LFM / Cy3mRNA

Rab5

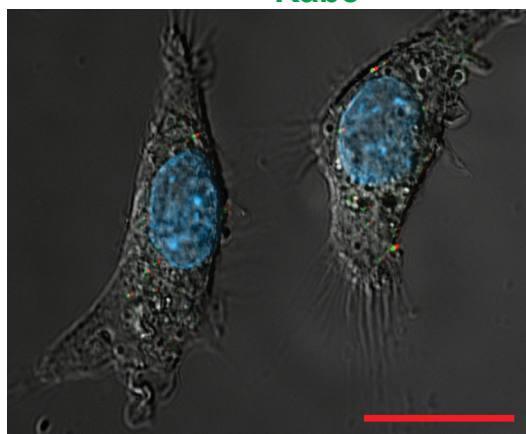

Rab7

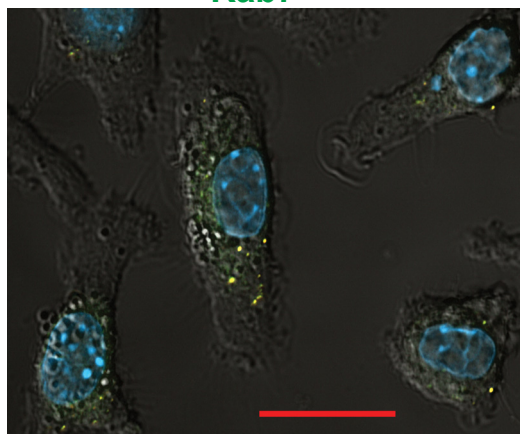

Rab11

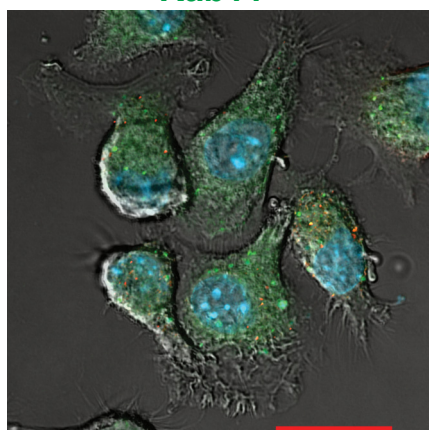

**Figure S2.** Intracellular trafficking of Cy3 mRNA-LFM complexes in DC 2.4 cells by confocal microscopy with either Rab5-GFP, Rab7-GFP or Rab11-GFP. Nuclei were stained with DAPI. Bar represents 20  $\mu$ m.

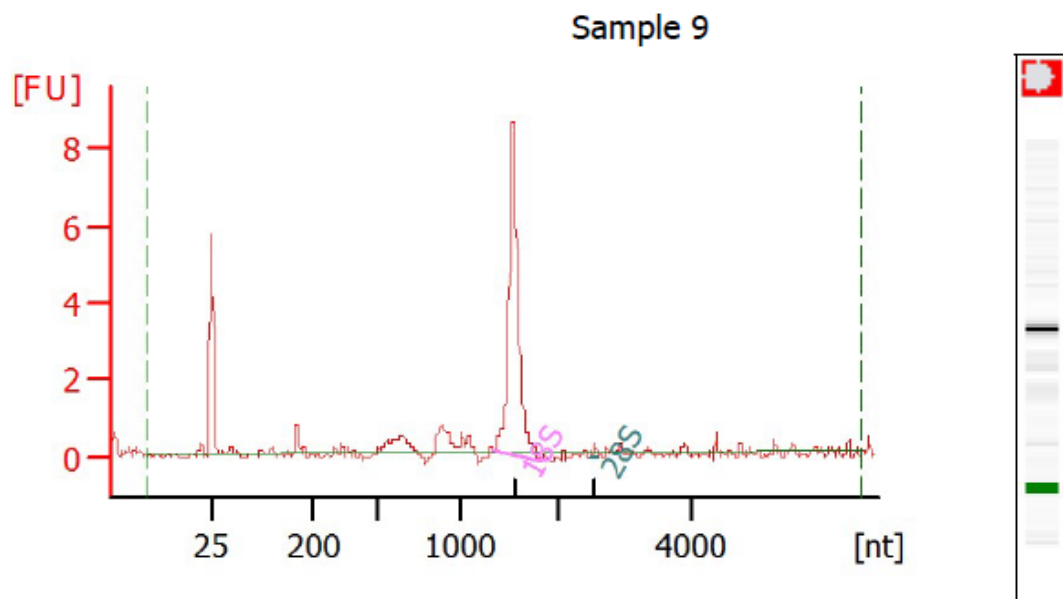

**Figure S3.** Agilent analysis of the GFP mRNA produced by *in vitro* transcription.
